# Supplementary material for: The Gyc76C Receptor Guanylyl Cyclase and the Foraging cGMP-Dependent Kinase Regulate Extracellular Matrix Organization and BMP Signaling in the Developing Wing of Drosophila melanogaster
Source: PubMed Central journal article supplement (PMC4595086; doi:10.1371/journal.pgen.1005576), 2015-10-06
Supplement: pgen.1005576.s002.pdf [file pgen.1005576.s002.pdf]

BDGP sequence (from *iso-1* strain with tandem duplication)

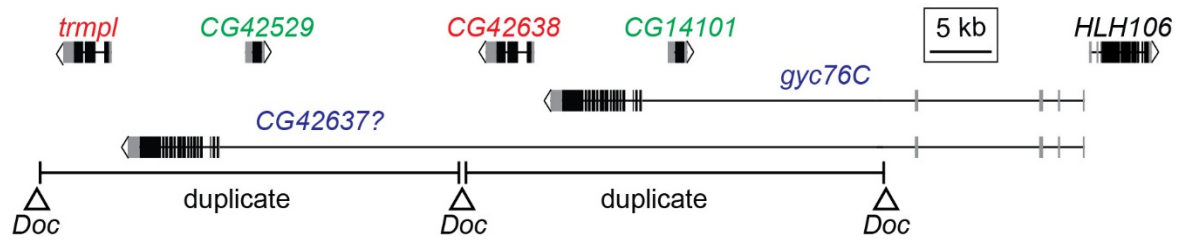

**S2 Fig. Tandem duplication of *gyc76C* genomic region in BDGP sequence.**
